# Supplementary material
Source: Springer Nature journal article supplement (https://www.springermedizin.de/resource/supplementary/12894_2012_223_MOESM4_ESM.pdf/9513238)

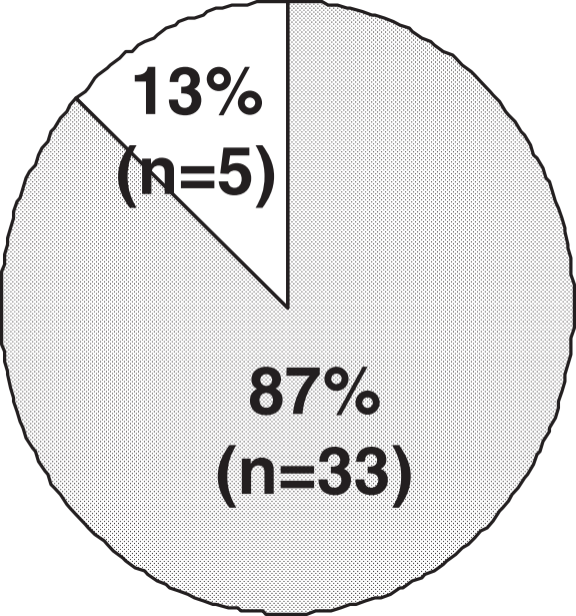

**13%**  
**(n=5)**

**87%**  
**(n=33)**

Supplement: MOESM4 [file 9513238]
